# Supplementary material for: Integrated genomics of ovarian xenograft tumor progression and chemotherapy response
Source: BMC Cancer. 2011 Jul 22;11:308. doi: 10.1186/1471-2407-11-308 (PMC3155912; doi:10.1186/1471-2407-11-308)
Supplement: Additional file 4 — Table S2. List of genes down-regulated by MT19c. [file 1471-2407-11-308-S4.XLS]

## Sheet: Sheet1
probeset_id	total_probes	gene_assignment	gene_id	T8A	T8B	T8C	T16A	T16B	T16C	T28	T32	N8A	N8B	N8C	N16A	N16B	N16C	N32	Log2 Fc T vs N	P T vs N	q T vs N
8178435	24	NM_003897	IER3	619.34	669.578	454.938	758.291	1375.54	926.443	1093.56	712.363	1043.67	2109.86	1255.14	1126.4	1522.02	907.024	1549.9	-0.775285	0.0494394	0.0471721
8031207	12	NM_006866	LILRA2	43.9056	35.5605	41.5508	31.8367	18.8582	42.8027	32.6131	65.1583	35.5744	57.5491	45.5443	38.5769	68.0077	67.0865	32.5934	-0.600088	0.0434568	0.0432454
8053654	24	NM_001443	FABP1	14.5854	34.0711	10.0179	12.7632	19.4829	31.5268	23.3777	25.0387	28.7139	36.2037	29.7847	19.4188	31.6397	28.9736	33.4452	-0.679453	0.0405948	0.041296
7899627	32	NM_022164	TINAGL1	342.272	367.36	162.607	321.684	311.903	775.398	798.467	319.965	435.947	308.157	352.961	689.34	480.132	563.962	689.042	-0.647469	0.0398206	0.0407997
8178086	39	NM_005346	HSPA1B	822.17	785.735	482.356	554.211	931.068	752.109	1236.54	732.765	1682.32	1330.95	1262.73	856.986	950.153	750.86	1151.53	-0.671536	0.0389419	0.0402215
7908499	24	NM_030787	CFHR5	19.2894	27.6933	15.2904	10.359	25.3942	27.1735	23.4119	27.74	24.9234	36.7385	36.2294	17.4265	42.3173	35.3848	28.8898	-0.714473	0.0342734	0.0367844
8108370	32	NM_001964	EGR1	309.071	424.247	706.648	626.615	761.359	1001.5	720.01	444.303	588.418	1210.57	1018.68	1560.14	990.985	687.541	586.016	-0.835658	0.0337939	0.0364386
7940210	29	NM_173801	PLAC1L	10.1204	7.74136	12.8827	19.7852	13.3629	24.6116	20.196	25.664	15.787	33.3767	19.6177	20.3997	28.7309	15.4406	20.0088	-0.798489	0.0330114	0.0358402
8075924	26	NM_002405	MFNG	79.9356	78.4381	72.5774	69.103	87.9713	43.8324	106.363	57.6574	142.824	153.528	156.872	88.9708	79.8438	92.5752	117.91	-0.617978	0.0315782	0.0347004
8049620	29	BC031951	FAM132B	458.266	509.377	315.88	457.432	553.532	477.965	585.533	401.15	636.689	591.377	625.943	1079.2	680.311	583.751	744.083	-0.608245	0.0289332	0.0326411
8082585	27	ENST00000312481	FLJ35880	26.8897	35.9203	59.0904	28.8526	47.4745	74.4694	35.2701	75.1499	47.7672	50.9275	56.9999	65.0999	89.7103	95.8333	42.4638	-0.772488	0.0275855	0.031596
8096061	29	AK128642	C4orf22	18.0873	18.4767	24.166	26.0057	16.6225	36.8071	22.5961	40.9785	30.6361	26.0495	23.9998	28.5295	39.2057	49.1075	26.6147	-0.67137	0.0261355	0.030422
7925761	15	NM_001004734	OR5BU1	82.0101	68.1362	51.9312	49.5829	56.7556	37.5299	70.4325	73.7352	80.1717	117.961	127.821	90.8126	67.6538	83.0503	82.7784	-0.616632	0.0216169	0.0267021
8133721	18	NM_001540	HSPB1	1020.36	1133.25	1084.95	808.544	820.874	714.214	1466.34	1486.75	1876.38	1394.37	1517.49	1970.23	1028.9	1119.43	1232.4	-0.608552	0.0214769	0.0265953
8163548	43	NM_138424	KIF12	243.573	340.865	407.039	262.204	279.367	174.075	458.256	274.872	597.425	479.11	633.639	404.075	344.124	383.687	469.268	-0.6275	0.0213774	0.0265139
7976795	19	NR_003530	MEG3	8.36226	34.2644	23.3354	37.6866	35.3785	76.2	41.7298	47.0957	43.5067	36.3746	53.6679	41.2946	71.0372	48.3471	38.4149	-0.818533	0.018738	0.0242605
7922127	8	NM_003175	XCL2	40.3365	57.8534	74.6443	53.5425	95.3042	95.3224	59.687	99.2973	71.0648	115.097	112.62	79.849	129.499	105.168	87.7815	-0.667924	0.0186973	0.0242349
8023910	9	AK098581	FLJ25715	53.0166	84.1064	60.545	20.5059	70.5741	71.9707	54.7688	83.9566	70.7074	122.736	118.913	64.9245	139.067	138.612	121.832	-0.918562	0.0178067	0.023448
7907249	31	NM_001002294	FMO3	36.1483	26.7663	29.6826	35.2754	48.7567	30.6977	31.5284	34.3866	49.4626	43.2103	53.6627	44.3618	68.0621	72.5181	29.2912	-0.644282	0.0139393	0.0199573
8132803	9	NR_003595	CDC14C	90.2173	124.886	85.9007	61.0544	98.9946	148.232	69.4067	192.18	97.9673	154.516	195.118	121.619	206.539	168.704	130.524	-0.771529	0.0128877	0.0189516
7939973	25	NM_001004747	OR5T3	2.80445	4.49838	2.8044	2.90507	2.69721	5.44311	3.86035	7.675	8.11286	4.22864	3.96202	6.34612	8.22748	4.96202	5.66952	-0.926863	0.012347	0.0184002
8141463	13	NM_024637	GAL3ST4	55.8156	43.3243	58.8092	35.7972	44.1892	96.1393	31.8909	64.6754	55.8634	80.1375	68.6417	57.505	97.9704	93.1246	33.7953	-0.666679	0.0120926	0.0181907
8124440	27	NM_003534	HIST1H3G	152.732	127.946	144.759	159.533	94.9151	165.784	165.644	91.284	250.217	160.497	178.991	255.871	162.299	230.388	219.87	-0.601925	0.0121013	0.0181907
7984259	6	NR_002755	RNU5D	106.566	107.262	162.217	202.704	117.659	330.322	130.907	346.935	197.844	204.687	174.056	192.029	256.086	273.184	192.664	-0.635125	0.0119416	0.0180418
7938082	23	NM_001037329	CNGA4	48.6091	35.8725	44.4207	39.8366	31.0733	56.7119	38.3101	81.1153	40.5655	82.1567	61.713	53.0101	77.549	79.1108	49.9588	-0.716901	0.0109061	0.016979
8094093	24	NM_080819	GPR78	97.7756	88.3577	94.1128	74.8115	84.8724	124.663	109.533	103.661	97.6366	130.374	156.279	112.183	141.506	192.782	117.094	-0.654122	0.0104256	0.0164754
7981968	25	NR_003325	SNORD116-10	6.49203	6.51317	4.62626	7.08069	7.92283	9.38593	10.1987	6.90436	11.6148	8.39421	14.4177	11.8609	7.93121	8.98015	11.0965	-0.690448	0.0102445	0.0162869
8070780	12	NM_198696	KRTAP10-3	62.5638	64.7711	49.6919	53.6228	52.9302	48.4368	51.0089	89.8007	77.0521	93.5608	79.93	67.9344	89.7631	129.764	66.4091	-0.660828	0.00997981	0.0160632
7899615	35	NM_178865	SERINC2	345.917	379.398	269.722	421.601	352.082	1249.18	713.709	524.331	537.659	434.274	499.845	887.466	578.91	682.654	692.089	-0.770572	0.00976381	0.0158298
8114625	9	NM_194249	DND1	289	231.065	191.74	293.882	204.213	393.332	264.565	452.419	303.836	405.731	344.585	297.123	454.736	521.857	290.995	-0.681087	0.00966092	0.0157198
7998666	25	NR_002326	SNORA64	178.19	211.632	181.162	306.219	353.849	305.347	552.787	461.955	498.861	499.219	493.851	307.613	370.939	328.773	443.97	-0.758574	0.00963663	0.0157012
8003667	23	NM_002615	SERPINF1	49.7956	28.2818	30.5264	32.9532	39.3465	77.1408	65.2533	30.1694	47.3501	48.9462	54.2533	73.3605	67.878	48.8705	46.4019	-0.650072	0.00827389	0.0142598
7942118	27	NM_138768	MYEOV	288.981	262.15	259.749	303.533	349.317	333.377	417.305	503.816	565.992	432.441	470.113	528.686	361.997	318.084	514.421	-0.608102	0.00819979	0.0141724
8019709	6	NR_002716	RNU2	842.845	944.157	805.492	1310.64	1344	2519.12	2048.61	3268.02	1639.22	1514.74	2367.13	1473.27	1689.15	1440.21	1484.54	-0.685103	0.0080088	0.0139587
8094372	28	NM_003102	SOD3	64.5236	119.164	146.614	79.525	52.9276	79.4562	152.077	100.845	212.184	177.022	240.883	182.812	99.353	260.111	233.158	-1.07807	0.00783354	0.0137445
7937774	27	NM_016412	IGF2AS	198.969	230.465	215.747	204.058	212.01	283.15	284.438	323.035	213.313	362.661	316.523	275.634	413.554	350.705	257.341	-0.601588	0.00773649	0.0136386
8003875	31	BC041772	SPNS2	255.07	253.433	207.647	312.237	278.497	263.503	451.009	321.129	326.68	333.526	344.653	488.174	449.307	535.531	876.095	-0.659936	0.00682031	0.0126164
8124540	23	NM_003514	HIST1H2AM	90.6053	67.5889	80.385	101.085	68.4977	97.3286	167.05	73.6271	164.918	90.2741	142.59	150.243	102.665	138.846	156.524	-0.688829	0.00674416	0.0125341
8020357	22	BC028407	ANKRD30B	0.42321	5.5357	2.2503	1.86666	1.39195	4.9611	2.35228	13.6167	7.02103	7.37972	3.51824	8.52186	13.6251	10.5032	3.60782	-1.87763	0.00626756	0.0119653
8023995	27	NM_005860	FSTL3	297.569	292.543	200.228	242.911	333.554	248.607	304.022	285.598	556.772	509.869	488.503	396.637	417.002	291.886	433.086	-0.697947	0.00611058	0.0117734
7957608	23	AB041270	KRT19P2	226.874	273.85	341.559	437.329	352.162	376.747	537.994	374.45	630.035	582.089	478.838	473.289	460.358	413.575	642.171	-0.633734	0.00526012	0.0106893
8102247	7	AK094992	FLJ37673	89.1438	79.6129	79.8745	55.8784	66.5016	100.744	86.8125	121.95	100.309	133.661	108.338	108.99	128.549	181.007	90.9856	-0.773123	0.00511043	0.0104961
8019802	8	NR_002761	RNU2B	786.429	929.467	850.868	1406.59	1347.63	2752.18	2090.32	3622.92	1653.02	1625.31	2337.94	1565.09	1758.2	1475.87	1568.69	-0.705924	0.00506556	0.0104448
8075462	19	NM_080430	SELM	135.642	140.697	130.051	134.326	157.343	243.661	180.349	297.234	184.473	258.202	236.464	193.216	371.088	282.162	211.907	-0.864925	0.00506329	0.0104429
8075857	20	NM_003312	TST	119.799	134.861	164.257	201.051	131.132	152.517	243.236	98.3654	271.314	234.435	212.276	243.297	165.129	239.695	244.988	-0.600002	0.00496442	0.0103064
8052882	24	NM_017488	ADD2	17.7825	28.4132	29.4191	27.2475	37.7874	49.7694	24.1717	31.0348	39.3047	51.7514	46.8591	36.6179	38.9821	54.3946	41.7829	-0.666606	0.00460695	0.00983929
8074988	5	NR_003082	GSTTP2	40.9839	57.949	32.8871	40.9615	49.716	83.3345	57.396	110.292	81.4159	100.87	101.224	49.8436	67.6687	85.6773	60.5142	-0.866206	0.0045644	0.00978825
8059014	30	NM_017521	FEV	269.054	368.003	420.046	373.41	325.476	514.202	331.379	546.385	414.531	527.678	579.561	432.684	634.268	641.303	417.629	-0.616227	0.00453428	0.00975821
8035639	26	NM_023002	HAPLN4	167.279	169.166	192.464	215.088	188.368	154.914	218.947	204.713	364.98	292.33	409.677	246.76	259.724	255.036	227.68	-0.708666	0.0044267	0.00962481
7942594	25	NR_000025	SNORD15B	289.478	274.297	278.615	456.018	453.286	583.098	816.643	748.878	748.137	641.379	635.746	501.699	578.519	432.536	731.765	-0.751155	0.00440871	0.00961407
7941302	26	NM_001098785	FAM89B	249.33	243.551	264.699	216.72	222.922	271	300.393	301.021	469.553	405.08	370.356	373.215	278.652	293.324	348.173	-0.608325	0.0041989	0.00936665
8068231	27	NM_005806	OLIG2	74.6131	84.1179	98.6421	88.9973	66.4137	107.29	75.6846	93.8002	100.079	117.44	133.495	105.717	156.974	150.424	99.6834	-0.625395	0.0041193	0.009252
7984635	31	ENST00000341689	FLJ27523	32.5263	34.7987	27.1283	22.9833	26.9663	46.3434	26.2906	52.7295	32.8441	46.1763	45.4769	47.5322	63.7558	57.9688	24.2196	-0.761475	0.00397474	0.0090617
8117900	33	NM_013993	DDR1	350.431	441.553	326.985	342.106	469.593	362.705	558.79	329.584	645.674	714.007	688.087	539.929	494.183	471.691	642.578	-0.617135	0.00392945	0.0090126
8006786	6	XM_290799	ARHGAP23	65.4009	45.5741	79.5112	74.8969	40.2693	137.038	73.2623	131.268	86.6561	105.456	104.949	93.9974	95.9927	138.813	85.383	-0.770925	0.00324928	0.00806982
8132805	27	NM_198570	VWC2	136.289	132.905	124.844	130.907	138.178	198.429	139.959	238.012	148.512	218.075	211.542	188.085	270.385	266.232	181.771	-0.711265	0.0030948	0.00783971
8177867	29	NM_001954	DDR1	372.677	471.169	351.721	368.901	510.314	386.736	610.377	352.82	720.416	779.694	763.098	591.322	540.478	522.777	706.9	-0.654044	0.00304586	0.0077746
8130578	24	NR_002960	SNORA20	139.314	116.57	84.2745	137.846	137.014	130.482	205.601	94.5782	328.642	341.475	368.287	232.482	210.46	177.002	266.071	-1.16801	0.00254342	0.00696634
8070315	26	AY204749	C21orf24	37.2379	32.5416	31.2801	23.1723	41.7608	54.9511	42.5188	43.5566	62.8532	61.3797	60.1735	42.9972	42.7645	66.7423	44.4095	-0.758211	0.0024461	0.00681969
7974363	27	NM_000953	PTGDR	67.1676	90.7118	75.7864	75.9761	60.8382	78.8907	71.73	100.203	87.8526	110.245	133.618	97.582	128.238	118.186	106.291	-0.603998	0.0023142	0.0066146
8049299	25	NR_003006	SCARNA6	202.012	159.521	148.755	181.662	215.395	182.56	299.589	299.057	336.214	299.982	361.097	243.246	260.882	238.842	273.509	-0.676549	0.00216195	0.00632874
8006900	26	NM_002686	PNMT	280.879	306.723	124.4	236.264	153.554	168.373	437.479	111.478	440.296	404.728	357.788	611.003	593.212	707.209	1045.69	-1.23596	0.00205806	0.00615971
7937763	24	NM_021134	MRPL23	377.046	346.96	393.724	608.892	382.487	602.981	408.276	553.718	788.037	631.961	697.753	582.625	672.907	583.212	678.647	-0.644554	0.002046	0.00613865
8010770	39	NM_004207	SLC16A3	529.888	649.666	275.711	641.558	773.07	746.584	962.141	854.823	968.403	1318.12	1000.41	844.645	1279.11	978.539	1493.2	-0.891609	0.00199833	0.00604427
7904717	27	NM_213653	HFE2	49.5512	51.3808	59.408	52.1307	61.0232	70.508	60.5681	67.6691	75.6746	86.0003	84.0774	70.062	95.6475	116.429	66.732	-0.685697	0.00197151	0.00599178
7923372	26	NM_012396	PHLDA3	132.942	149.165	154.618	134.832	150.532	316.49	157.773	291.843	221.845	231.67	243.903	398.541	277.597	260.215	205.139	-0.914921	0.00193143	0.00592671
8124391	24	NM_003513	HIST1H2AB	235.83	238.392	303.432	352.148	253.736	392.995	545.569	132.487	503.177	341.373	465.874	542.611	374.947	487.602	444.586	-0.709865	0.00191003	0.00588618
8166440	25	NM_182699	DDX53	34.6742	39.5957	37.3924	35.6097	24.1472	61.3523	27.7682	40.396	42.9928	57.4158	49.6378	47.1609	63.396	51.9978	30.3994	-0.603759	0.00185111	0.00576833
8156278	38	NM_005226	EDG3	86.7232	79.894	92.671	65.3694	89.5043	141.796	88.6412	164.561	98.7158	140.355	130.811	112.887	158.353	131.597	113.923	-0.636713	0.00165889	0.00546109
8030360	25	NR_000021	SNORD32A	223.047	203.171	165.15	232.322	296.632	276.193	400.136	473.446	629.808	476.566	512.404	380.912	393.597	337.868	510.919	-1.02256	0.00162556	0.00540862
8124385	21	NM_003544	HIST1H4B	284.839	273.338	317.897	428.798	328.535	418.39	667.86	260.181	552.685	406.46	572.88	642.977	466.536	525.466	511.26	-0.6922	0.00153441	0.00522316
8067798	26	NM_018419	SOX18	191.351	164.353	174.033	170.692	177.207	250.853	173.134	257.059	202.628	265.131	259.767	252.613	309.867	333.034	235.371	-0.62397	0.00148887	0.00511526
8163109	26	NM_014334	C9orf4	268.446	385.541	359.338	320.188	429.101	591.717	399.01	529.754	435.731	526.518	578.457	488.955	637.463	625.092	431.296	-0.638308	0.00147747	0.00508631
8132209	16	NR_003502	LOC441208	294.998	320.241	370.339	440.91	284.027	487.76	413.489	431.199	515.067	587.633	683.307	453.754	545.139	733.806	454.992	-0.77758	0.0014734	0.00507982
8144705	25	BC035082	C8orf79	60.8886	100.032	84.1056	104.805	106.065	110.508	108.862	64.7051	157.901	134.442	163.345	133.654	123.039	127.015	110.985	-0.617611	0.00143741	0.00503288
8117608	45	NM_003511	HIST1H2AL	441.435	395.914	403.838	435.618	353.743	557.173	646.108	397.854	686.744	518.631	605.215	741.453	489.454	659.527	613.062	-0.603021	0.00143487	0.00502962
7897227	30	NM_018836	AJAP1	53.0365	55.7379	79.2964	63.9032	79.3147	169.751	82.6911	178.278	93.2729	138.395	101.5	120.822	148.099	102.264	80.3906	-0.825175	0.00137197	0.00492602
8124534	26	NM_003546	HIST1H4L	686.131	681.383	807.304	953.359	730.562	1298.58	1589.08	612.613	1570.11	1047.71	1205.53	1734.4	1163.19	1395.49	1600.26	-0.80968	0.00134808	0.00488066
7945801	25	NR_002982	SNORA54	75.5617	82.5323	74.9679	85.5554	84.8438	112.906	135.481	121.065	184.132	156.815	172.258	129.247	107.181	121.005	123.519	-0.846609	0.00125432	0.0047152
8055239	24	NM_032545	CFC1	72.9423	80.8661	80.4922	75.4308	93.004	101.909	85.0211	120.331	100.459	132.014	146.343	100.147	130.897	142.166	111.661	-0.637915	0.00122891	0.00468411
8028563	25	NM_021107	MRPS12	64.5214	67.2646	77.2094	88.1199	95.2581	113.56	137.27	100.777	138.237	117.019	120.538	153.691	102.605	114.153	137.85	-0.664383	0.00120873	0.00465342
8025035	29	NM_032306	ALKBH7	97.5333	123.265	153.17	143.254	134.008	143.204	185.662	141.721	232.152	238.194	191.285	190.71	180.793	172.487	206.768	-0.625501	0.0011542	0.00454606
8125766	10	NM_001188	BAK1	195.195	210.631	184.987	233.411	161.093	285.919	307.502	254.753	426.78	271.147	301.888	441.805	330.536	338.075	397.284	-0.835706	0.00108366	0.00438503
8049670	39	NM_002081	GPC1	195.704	218.362	211.141	211.907	208.418	425.254	267.72	250.837	300.699	338.174	343.732	470.92	291.31	339.523	307.12	-0.732333	0.00108111	0.00437923
8111670	25	NM_000514	GDNF	114.35	137.271	125.771	124.412	130.261	181.244	117.412	203.378	190.75	237.618	217.494	153.552	251.668	187.93	204.654	-0.70801	0.000961895	0.00410095
7945663	26	AK022293	CTSD	150.623	149.609	188.595	219.118	184.491	161.006	239.925	258.027	304.796	311.889	286.34	295.145	238.093	224.929	406.98	-0.633364	0.000887795	0.00394678
8007493	26	NM_001661	ARL4D	154.514	170.544	153.293	171.277	149.239	265.617	234.733	180.661	271.754	266.153	224.421	286.653	189.764	223.381	224.732	-0.609008	0.000871727	0.00391395
8126524	26	NM_199184	C6orf108	253.767	283.845	271.847	323.467	276.058	301.962	379.372	231.334	543.713	450.115	380.072	440.38	378.497	393.21	402.831	-0.613026	0.00082726	0.00378934
8117543	21	NM_080596	HIST1H2AH	145.383	127.424	147.312	179.793	120.766	186.5	267.493	130.376	284.894	194.246	222.552	274.042	211.089	228.703	274.454	-0.710877	0.000825224	0.00378685
8065547	14	AK127732	FLJ45832	8.3936	5.94581	5.94457	5.40882	12.2014	6.82489	5.95617	2.76321	13.9812	14.0421	13.1202	17.5992	16.7322	20.5073	14.2551	-1.07775	0.00081806	0.00377377
7992584	24	NM_001374	DNASE1L2	50.2111	62.9127	61.8395	55.232	63.6286	50.173	73.2261	76.5522	70.5038	86.1142	104.514	89.4954	102.075	82.8839	91.6655	-0.603131	0.000801132	0.00374253
8073816	29	AK130875	FLJ27365	242.661	276.503	257.945	268.267	287.184	309.124	390.736	253.152	443.652	425.653	505.162	354.499	389.523	337.435	478.601	-0.619032	0.000783193	0.00371298
8178977	24	NM_172208	TAPBP	794.291	705.622	758.108	627.739	815.955	832.914	1023.78	864.366	1261.31	1183.56	1319.07	1103.13	1002.02	897.707	1112.38	-0.607246	0.000779412	0.00370426
7996081	35	NM_201524	GPR56	791.006	836.853	555.768	595.41	625.483	951.776	1159	920.408	1278.34	1068.16	1095.43	1487.01	1021.84	1032.88	1509.42	-0.773498	0.000762218	0.003669
7911529	11	NM_032348	MXRA8	447.372	566.825	558.378	447.31	452.599	782.754	547.041	833.446	613.603	780.806	782.599	660.631	892.822	779.436	683.004	-0.604099	0.000756214	0.00365775
8165334	31	NM_004669	CLIC3	74.242	88.9671	95.1234	57.1346	80.0674	110.21	100.044	132.829	131.179	114.663	130.228	104.664	154.498	130.664	102.04	-0.69031	0.000732014	0.00359144
7936494	28	NM_005264	GFRA1	86.0101	104.741	101.825	102.285	125.755	146.037	92.188	210.643	135.848	177.15	184.398	136.055	176.644	155.689	119.661	-0.628447	0.000714575	0.00353007
7904737	29	NM_001039888	ANKRD34	119.381	159.006	130.792	131.953	149.23	187.351	138.173	185.884	179.536	232.824	273.458	193.157	253.264	262.639	232.032	-0.751678	0.000635142	0.00328825
7977732	25	NR_002916	SNORD8	227.832	252.22	222.182	319.117	258.181	304.593	351.058	292.705	448.14	441.81	490.855	339.148	376.487	371.564	402.122	-0.684693	0.000621671	0.00325706
8048725	27	NM_058165	MOGAT1	69.0246	69.4779	82.9831	102.673	98.0628	126.432	127.503	143.805	135.236	164.962	164.136	117.12	197.881	159.624	153.282	-0.890028	0.000617402	0.00323927
8034772	25	NM_018154	ASF1B	293.937	327.988	312.754	319.985	280.071	420.019	508.774	189.778	598.315	397.872	436.589	572.158	471.227	586.134	565.227	-0.733589	0.000611935	0.00323041
8052018	25	NM_022055	KCNK12	188.041	219.873	237.729	204.177	196.929	315.201	214.268	322.303	276.685	334.345	331.108	263	367.022	377.645	276.523	-0.634382	0.000606573	0.00321648
8117746	25	NR_003049	SNORD32B	58.537	45.8491	45.2526	53.5457	65.1254	129.371	106.992	177.641	201.153	149.906	171.745	107.452	113.936	115.543	154.04	-1.41696	0.000594808	0.00317117
8048749	21	NM_080671	KCNE4	112.695	91.2097	96.5688	118.232	109.441	118.966	111.695	172.994	141.112	162.666	155.042	151.572	206.522	181.096	120.179	-0.655082	0.000561795	0.00309567
8145793	5	NR_003041	SNORD13	669.379	561.628	439.697	671.082	707.264	712.357	1158.92	1259.64	1169.75	989.37	1065.32	916.285	1037.14	790.323	1043.52	-0.705898	0.000549113	0.00305192
8016168	43	NM_133373	PLCD3	236.822	222.978	255.819	258.997	222.711	292.142	316.365	408.1	505.112	453.927	450.703	344.993	367.849	332.164	394.974	-0.772723	0.000546879	0.00304755
7960702	27	NM_031299	CDCA3	91.2861	96.8977	110.701	110.385	85.1754	101.831	154.881	71.9999	172.336	133.178	138.418	190.784	144.526	169.152	177.585	-0.676643	0.000521044	0.00296824
7941694	26	NM_006328	RBM14	413.599	399.623	417.522	392.805	372.824	439.596	536.341	513.826	725.354	641.528	697.57	622.641	517.88	505.08	560.171	-0.631025	0.000516898	0.00296023
8069208	52	NM_030582	COL18A1	558.094	653.423	601.74	570.203	594.907	573.274	803.086	736.183	1102.6	1064.57	1173.54	762.374	959.855	842.64	899.454	-0.724522	0.000489298	0.0028853
8102636	27	NM_152399	TMEM155	45.8986	49.8781	35.2618	40.5035	45.16	48.1953	49.0131	79.482	58.2938	75.9108	75.8302	57.9954	80.2135	80.6365	66.7922	-0.721828	0.000465328	0.00280569
8061940	26	BC032818	C20orf144	328.592	273.987	292.322	302.454	277.813	515.341	323.267	694.997	423.736	506.572	531.532	389.814	602.965	581.052	427.3	-0.778102	0.000451115	0.00277308
7941260	19	ENST00000317568	FRMD8	64.107	90.3747	94.4574	101.927	90.1963	106.278	121.21	76.1589	164.389	137.242	158.471	184.063	130.87	127.697	160.98	-0.770281	0.000442297	0.00274042
8141791	10	NM_001097615	POLR2J3	419.13	527.003	524.909	550.759	638.023	533.155	727.448	517.405	1062.49	946.92	1021.09	776.026	854.293	732.552	918.36	-0.75682	0.000430742	0.00272557
8006896	25	NM_003673	TCAP	230.674	269.895	293.607	297.463	244.744	327.863	310.771	313.276	465.587	420.822	571.244	377.148	413.9	420.924	381.083	-0.735269	0.000432258	0.00272557
8165258	28	NM_006412	AGPAT2	445.697	448.252	398.301	509.855	517.572	723.123	608.493	697.238	762.333	819.721	614.611	819.238	777.524	599.963	911.782	-0.658376	0.000403223	0.00263501
8049567	27	NM_005855	RAMP1	123.255	135.975	72.752	117.09	96.9729	128.971	105.918	260.174	194.754	193.763	252.076	192.791	190.129	275.443	203.66	-0.987227	0.000395253	0.00260236
7941936	28	NM_000852	GSTP1	2618.36	2593.74	2393.52	2517.51	2449.32	3051.91	3405.89	2746.86	4447.18	3770.99	3447.41	4544.32	3377.22	3444.45	3765.94	-0.610312	0.000387436	0.00257264
7915347	25	NM_133467	CITED4	141.374	198.64	110.551	162.973	168.765	264.598	234.631	189.34	294.514	250.611	214.347	287.145	269.808	244.88	297.401	-0.73392	0.000379843	0.00254681
8129562	31	NM_001901	CTGF	168.605	196.847	126.101	153.856	144.555	230.358	210.788	188.032	272.658	219.277	242.318	283.452	229.938	228.786	147.658	-0.639217	0.000366903	0.00249913
8035880	9	NM_006003	UQCRFS1	93.0558	89.8399	57.5225	119.915	104.286	193.43	119.079	162.127	150.732	141.765	146.488	148.132	165.23	179.033	179.45	-0.740288	0.000365484	0.00249489
7931556	22	NM_014468	VENTX	56.0483	84.1595	64.3409	67.7325	74.4762	128.943	93.5847	128.855	91.3841	128.898	115.383	125.333	148.906	123.495	119.363	-0.81764	0.000349325	0.00242786
8148463	25	AF220264	C8orf17	113.396	88.702	105.414	147.771	122.23	149.03	95.2711	69.7776	173.889	215.888	213.905	156.533	203.708	220.152	193.866	-0.772802	0.000348811	0.00242643
7950032	28	NM_002007	FGF4	185.806	201.561	197.771	205.197	196.107	304.289	212.622	327.031	261.632	340.551	380.45	296.038	420.481	351.874	274.709	-0.793006	0.000346795	0.00242048
7998759	26	NM_001042371	LOC283871	324.463	333.706	310.711	362.109	277.711	460.178	427.412	364.594	594.247	424.757	500.309	552.524	432.051	531.816	622.839	-0.6531	0.000334293	0.00237095
8137959	31	AY129022	LOC441193	357.902	416.848	450.09	409.212	375.514	554.543	482.65	581.369	520.375	588.816	663.606	541.913	704.048	692.798	511.678	-0.622105	0.000325605	0.00233727
7949373	27	NM_014205	ZNHIT2	60.4154	83.7667	83.3418	64.7513	87.283	92.8012	83.008	100.308	106.799	124.649	123.104	100.652	124.343	135.495	96.8504	-0.65067	0.00031876	0.00230706
8015827	25	NM_025237	SOST	76.7486	125.394	98.4124	89.2554	136.172	142.793	155.218	229.637	167.042	155.363	188.407	177.917	196.128	212.293	158.834	-0.79764	0.000299979	0.00222027
8077160	27	NM_000487	ARSA	191.815	181.748	173.865	157.297	139.402	225.992	231.954	152.276	354.257	265.492	287.253	285.172	249.026	246.388	296.112	-0.736397	0.000300113	0.00222027
8035648	40	NM_001001524	TM6SF2	712.24	648.303	731.158	769.8	734.76	656.395	909.443	795.37	1420.11	1297.48	1402.84	1041.79	1055.71	1032.42	1041.78	-0.748518	0.000293556	0.00220846
8001938	21	NM_003789	TRADD	497.678	526.198	552.384	647.013	539.613	694.506	635.554	606.852	776.169	843.284	851.534	734.097	844.647	1028.62	751.477	-0.615148	0.000268466	0.00209311
8118007	35	NM_001517	GTF2H4	138.137	141.988	140.388	147.898	170.482	140.183	236.121	178.71	284.797	246.954	257.166	233.515	196.281	208.747	230.073	-0.686976	0.000263135	0.00207814
8116070	20	NM_005451	PDLIM7	394.66	380.4	232.2	331.71	370.461	602.008	373.221	377.255	569.673	537.985	622.815	566.936	541.14	459.439	404.959	-0.685036	0.000263034	0.00207814
8059739	26	NM_024409	NPPC	378.274	440.583	434.182	411.592	470.832	589.608	482.633	720.516	545.336	683.815	665.869	561.688	717.549	734.982	578.35	-0.609305	0.000257708	0.00206232
7949808	27	NM_004910	PITPNM1	248.79	312.423	296.512	257.84	278.961	362.573	343.064	392.955	496.666	452.647	523.491	484.452	394.624	365.326	434.126	-0.699315	0.000245322	0.00202494
8027932	21	NM_001863	COX6B1	586.57	571.382	625.236	789.781	616.564	899.087	973.167	893.484	1044.75	932.863	1016.44	1138.88	820.842	1001.75	1159.62	-0.63785	0.000227906	0.00194271
7998510	28	NM_001287	CLCN7	263.89	338.628	330.906	330.008	332.707	326.843	495.779	443.062	567.653	469.325	537.211	462.342	447.464	424.964	527.361	-0.602883	0.000223315	0.00191976
7991904	26	NM_004204	PIGQ	130.071	106.07	120.525	111.807	89.4176	134.188	194.217	126.88	254.953	197.537	192.967	214.87	171.233	176.43	237.571	-0.851522	0.000219204	0.00189893
8063650	27	NM_024663	NPEPL1	159.363	219.691	199.952	215.599	229.081	249.526	260.178	194.594	354.298	366.906	341.284	262.397	305.051	328.358	307.918	-0.672791	0.000211735	0.00185851
8149673	36	NM_025232	REEP4	243.879	255.088	265.297	285.807	234.904	331.794	406.744	182.149	424.615	356.116	363.163	494.295	374.629	425.492	499.871	-0.661106	0.000211212	0.00185624
7913450	117	NM_005529	HSPG2	560.179	629.197	489.478	520.849	635.758	881.914	860.259	596.47	1026.11	838.994	973.77	793.005	967.564	772.33	860.779	-0.658781	0.000208502	0.0018488
7896822	49	NM_198576	AGRN	762.814	840.81	790.381	889.801	919.574	910.894	1284.76	822.156	1465.13	1433.18	1636.43	1165.28	1303.97	1174.99	1389.29	-0.697336	0.0001991	0.0017952
8022831	26	BC091517	C18orf34	40.4605	27.2376	30.9347	32.1598	42.3844	43.9999	32.4023	48.8774	61.8659	59.0184	69.2452	58.2505	86.2494	67.7828	56.3232	-0.953393	0.000196427	0.00178199
8018449	40	NM_199242	UNC13D	162.731	185.015	183.949	149.4	222.67	281.6	256.343	223.786	309.667	284.458	296.855	324.487	282.733	234.669	325.298	-0.676106	0.000192533	0.00176702
7897745	27	NM_001040194	AGTRAP	358.264	320.017	255.315	371.354	409.146	476.346	487.303	448.658	566.592	553.058	534.054	508.942	509.828	456.792	605.157	-0.605342	0.00018645	0.00174164
8065868	26	NM_002212	EIF6	741.223	847.431	805.409	903.151	922.869	1139.73	1277.47	1227.95	1488.53	1306.21	1160.45	1405.26	1194.17	1128.46	1495.8	-0.601379	0.000182357	0.00172001
8000706	32	NM_006319	CDIPT	511.143	523.021	476.145	463.339	483.291	571.483	685.064	633.231	1014.25	830.93	773.081	882.069	704.244	713.874	778.099	-0.738307	0.000178532	0.00169889
7937508	30	NM_004357	CD151	677.374	721.421	582.468	794.666	896.385	910.543	1200.6	988.249	1723.38	1455.27	1477.98	1387.39	1163.28	1156.85	1452.17	-0.924496	0.000175162	0.00168988
8009951	46	NM_000213	ITGB4	931.743	1002.52	745.528	1194.54	1085.73	1425.59	1756.51	969.592	1708.77	1548.75	1829.61	1508.12	1449.7	1477.39	1931.41	-0.677923	0.000160035	0.00161979
8074842	45	XR_017586	LOC644988	124.215	131.623	145.54	121.275	144.344	197.884	182.785	154.089	240.799	197.752	181.388	220.917	213.319	180.048	193.103	-0.624818	0.000158378	0.00160824
7992271	25	NM_016111	TELO2	151.262	121.275	135.868	100.706	134.8	129.061	164.749	170.723	179.874	187.336	197.634	186.199	222.04	220.588	205.865	-0.627438	0.000150994	0.00156542
7945420	32	NM_203387	RNH1	211.777	264.851	272.668	290.376	324.033	468.868	411.028	405.028	555.075	467.927	482.425	443.784	409.285	404.909	423.345	-0.755881	0.000150287	0.00156539
8072088	25	NM_021115	SEZ6L	62.0633	47.958	50.2208	65.7371	69.3641	62.4642	52.2014	70.7665	84.031	101.434	101.667	94.4042	114.726	118.728	102.089	-0.795135	0.000148352	0.00156276
7937802	30	NM_004356	CD81	1244.15	1423.21	1374.55	1460.91	1517.08	1748.08	1974.25	2129.54	2833.61	2879.09	2514.84	2448.28	2095.12	2006.57	2675.24	-0.810847	0.000145904	0.00155985
7930857	32	NM_004098	EMX2	122.591	158.769	159.076	243.606	174.602	290.871	291.93	265.948	307.319	334.165	336.994	281.871	303.877	274.887	308.705	-0.835844	0.000140521	0.00154113
7944530	26	NM_178507	OAF	268.532	329.676	347.563	241.586	302.721	398.286	324.535	393.215	500.24	461.825	496.539	401.202	510.256	425.823	395.117	-0.644884	0.000140368	0.00154113
8009844	33	NM_001031803	LLGL2	202.936	205.221	169.173	204.299	210.207	157.968	343.216	183.731	386.437	299.762	335.266	309.671	278.875	292.945	407.823	-0.677032	0.000135417	0.00151994
8110399	26	NM_007255	B4GALT7	213.25	307.231	311.127	233.336	334.854	411.43	435.842	322.707	449.869	436.758	483.644	408.049	464.744	407.847	420.73	-0.658235	0.000134906	0.0015176
8021183	25	NR_003003	SCARNA17	1647.51	1493.02	1032.55	1726.87	1473.89	1819.21	2375.81	1753.26	3566.87	2869.03	3195.64	3025.63	3299.29	2163.25	2635.28	-1.03404	0.000133098	0.00151311
7898209	19	XM_946272	LOC645317	170.569	174.728	158.897	218.068	202.951	214.926	327.113	174.023	333.9	296.353	249.93	324.28	270.129	307.213	344.232	-0.682447	0.000128565	0.00150354
8061564	32	NM_181353	ID1	314.678	338.18	246.774	556.489	583.673	591.718	1045.2	469.209	839.455	923.458	834.55	984.537	874.312	744.624	1236.19	-1.08731	0.000125849	0.00149882
8060604	26	NM_000915	OXT	95.8167	116.166	113.733	115.636	115.266	152.882	114.885	207.823	155.865	186.457	202.144	153.212	198.459	208.253	164.171	-0.725462	0.000126004	0.00149882
8159642	17	NM_006088	TUBB2C	1773.47	1917.05	1891.77	1926.92	1568.75	2427.25	2638.59	1899.96	3097.39	2526.89	2617.71	3170.53	2453.35	2770.95	3010.27	-0.610907	0.000118739	0.00143627
7900922	40	NM_004047	ATP6V0B	383.418	390.5	434.179	452.103	381.199	605.889	591.771	574.736	943.723	800.077	698.306	943.549	640.936	726.161	864.909	-0.95617	0.000114671	0.0014109
8139758	16	NM_016139	CHCHD2	308.259	290.12	284.091	433.018	336.206	366.096	513.173	329.339	607.75	576.821	495.012	582.759	492.847	631.351	682.891	-0.772832	0.0001085	0.00138591
8023968	27	NM_004359	CDC34	165.14	166.047	163.11	174.533	183.615	249.757	247.257	211.505	334.795	286.628	283.281	287.424	242.735	235.946	286.892	-0.707833	0.000108094	0.00138591
8153474	26	NM_003313	TSTA3	504.973	567.932	546.601	503.795	446.714	736.023	834.083	422.156	878.152	701.554	748.895	886.498	709.365	773.604	861.558	-0.607256	0.000108629	0.00138591
8000757	36	NM_003586	DOC2A	101.898	97.0343	110.731	120.85	101.103	184.901	126.273	188.911	140.667	146.349	168.911	154.868	182.234	174.026	148.922	-0.600179	0.000103054	0.00136655
8006958	24	NM_199321	ZPBP2	15.4283	18.3228	15.0505	14.0178	21.7707	18.7601	11.0506	38.1741	29.4606	35.9233	36.1658	31.935	42.8196	29.782	39.559	-1.02165	9.19143e-05	0.00128103
8048995	27	NM_030926	ITM2C	708.257	732.811	792.396	852.87	779.681	737.517	996.076	867.492	1415.27	1368.3	1330.19	1150.81	1105.4	1077.8	1326.12	-0.682928	8.99089e-05	0.0012726
8023549	26	NM_013435	RAX	173.849	222.991	218.883	183.431	248.836	304.948	263.655	359.859	311.735	378.532	405.792	317.399	414.241	404.481	288.424	-0.827795	8.80315e-05	0.00126157
8016018	28	NM_016016	SLC25A39	804.464	853.573	839.154	817.673	744.561	837.945	1069.78	927.224	1495.2	1416.4	1481.06	1256.68	1094.43	1201.06	1386.85	-0.705706	8.50239e-05	0.00124104
7960117	27	NM_018663	PXMP2	330.493	358.462	381.452	273.98	293.495	335.103	411.955	298.766	541.002	474.921	499.522	543.033	439.546	497.04	502.067	-0.607722	8.08e-05	0.00122123
7993622	22	NM_001034841	LOC162073	130.962	138.503	139.198	136.823	119.069	175.013	192.656	204.025	341.156	279.903	309.816	296.292	229.654	219.193	237.745	-1.07154	7.9707e-05	0.00121415
7952179	29	NM_002105	H2AFX	339.135	380.174	366.117	380.026	324.86	452.198	562.584	279.674	563.945	471.805	523.392	643.284	524.433	582.324	619.125	-0.62323	7.95335e-05	0.00121415
8077116	23	NM_001014440	LOC440836	44.7568	50.6856	45.169	51.8548	53.723	55.5885	94.9349	69.0093	90.1041	83.8739	93.8271	73.307	93.6005	69.0763	100.497	-0.770017	7.37898e-05	0.00118198
8164554	34	NM_203434	IER5L	539.429	557.177	541.535	539.365	629.086	648.919	760.096	852.266	833.489	1020.63	990.164	753.248	962.1	857.54	934.787	-0.685686	7.09996e-05	0.00116077
7940451	41	NM_015533	DAK	188.281	226.723	211.746	222.883	202.316	158.619	292.53	224.767	377.124	363.666	333.815	327.251	286.289	296.214	317.584	-0.652574	6.84438e-05	0.00113227
8075934	48	NM_014550	CARD10	238.93	325.038	260.993	300.642	307.649	315.94	383.124	299.947	455.051	461.935	500.053	392.992	428.899	415.676	454.963	-0.626173	6.5117e-05	0.00109944
7898677	23	NM_004807	HS6ST1	239.289	226.778	291.005	302.859	238.103	323.137	429.113	312.165	528.539	473.258	491.92	494.502	356.488	503.648	556.349	-0.870767	6.35632e-05	0.00108811
8013319	8	NM_006613	GRAP	24.7806	20.0865	0.32164	43.9128	38.098	71.8352	30.0449	59.8023	72.1166	83.7977	87.7564	87.447	68.9283	79.4646	68.2572	-1.65143	6.15877e-05	0.00106587
7941732	32	NM_001032279	RCE1	383.708	385.376	371.421	357.554	399.591	443.704	523.739	524.391	628.915	611.839	645.244	513.113	565.779	501.809	538.75	-0.606314	6.00521e-05	0.00105289
7992789	28	NM_016639	TNFRSF12A	950.955	935.646	837.95	973.14	934.981	1573.89	1206.08	1193.12	1740.01	1434.43	1488.18	1828.98	1351.43	1452.6	1388.59	-0.741675	5.89917e-05	0.00103922
8065403	29	NM_000099	CST3	732.748	892.302	807.925	943.341	832.163	977.832	1290.32	1428.69	1569.15	1536.79	1443.6	1326.15	1273.43	1176.22	1422.48	-0.721177	5.78248e-05	0.00103453
8138799	34	NM_014817	KIAA0644	135.903	153.25	170.15	148.884	134.889	182.593	173.958	267.337	225.915	269.486	282.971	210.008	280.155	277.243	229.113	-0.793718	5.65631e-05	0.00103032
8035249	28	NM_005234	NR2F6	381.702	427.062	368.191	315.227	319.434	418.998	524.647	422.287	654.42	625.834	683.684	619.075	555.539	510.511	629.304	-0.747214	5.52405e-05	0.00102252
8165319	26	NM_018998	FBXW5	371.196	399.364	442.067	514.928	497.735	687.551	753.152	720.998	853.141	740.852	727.76	784.427	672.76	654.761	824.804	-0.731483	5.59333e-05	0.00102252
8032149	26	NM_002695	POLR2E	651.585	641.584	675.506	765.85	645.485	893.236	1035.7	854.91	1251.29	1035.51	1042.43	1136.29	925.63	1012.95	1200.65	-0.658934	5.51422e-05	0.00102252
8000884	30	ENST00000319285	XTP3TPA	559.04	534.4	504.258	551.791	520.383	587.333	708.158	534.268	939.504	875.65	687.966	896.858	778.531	820.202	924.864	-0.641752	5.58968e-05	0.00102252
8131326	14	NM_153247	SLC29A4	116.998	173.345	208.222	233.84	261.932	385.038	282.822	342.575	422.925	347.346	428.187	368.709	421.786	379.256	356.867	-0.988956	5.40765e-05	0.00101387
7959946	30	NM_016155	MMP17	205.727	245.467	279.609	314.264	274.95	360.812	281.104	386.533	374.135	444.511	486.104	417.292	473.944	444.76	381.338	-0.737354	5.24247e-05	0.00100105
8067288	16	NM_001001977	ATP5E	335.978	343.265	383.856	441.585	325.134	418.588	508.562	392.031	671.476	592.748	600.379	638.32	497.852	629.483	585.174	-0.725337	4.96502e-05	0.000977428
8131087	28	NM_001080461	UNCX	149.301	147.859	157.933	157.177	139.977	210.877	170.173	227.608	224.833	277.778	281.147	205.98	254.486	266.897	216.022	-0.74331	4.87531e-05	0.00096702
8035600	33	ENST00000162044	TMEM161A	177.221	202.888	193.217	196.374	202.49	238.234	289.486	226.927	430.543	366.889	373.825	358.722	290.455	317.261	383.083	-0.873711	4.82075e-05	0.000959066
8067409	98	NM_005560	LAMA5	495.748	627.288	466.221	539.719	654.457	686.35	918.709	619.98	1044.03	1047.12	1176.6	856.963	1022.7	892.609	1048.39	-0.854655	4.76911e-05	0.0009559
8035465	29	NM_016368	ISYNA1	338.446	348.987	195.197	330.011	327.037	187.772	502.498	412.267	558.457	523.539	510.613	495.816	489.958	497.482	537.883	-0.735329	4.68182e-05	0.000952953
8018494	28	NM_033452	TRIM47	229.09	210.459	195.811	220.19	243.043	237.197	291.378	250.102	374.267	331.551	335.203	371.189	324.581	288.715	344.258	-0.619591	4.46725e-05	0.00093062
7995206	38	NM_001042454	TGFB1I1	232.013	244.53	173.12	189.08	222.984	291.627	276.396	267.495	332.99	347.745	354.076	315.987	365.726	296.828	312.32	-0.660152	4.34978e-05	0.000918295
8087806	45	NM_020418	PCBP4	77.7754	93.5154	97.7689	99.6035	81.3503	177.712	119.528	88.1161	174.613	143.425	167.953	181.35	132.853	157.715	137.929	-0.826887	3.84054e-05	0.000844759
7999596	38	XM_001128282	LOC728138	288.219	319.406	263.409	244.892	283.534	382.263	375.711	385.193	481.945	496.861	445.366	423.691	420.539	387.853	459.019	-0.661491	3.586e-05	0.000809112
8006504	31	NM_017559	FNDC8	61.7219	49.5628	63.9372	55.9247	53.224	99.7792	58.5059	115.256	82.4456	102.089	98.2716	89.6135	108.28	111.461	78.9695	-0.795181	3.52399e-05	0.000797405
8066262	25	NR_003018	SNORA71D	167.902	160.228	157.333	228.215	221.395	247.889	352.009	248.712	301.303	331.982	349.394	303.734	317.582	292.366	358.735	-0.75705	3.44815e-05	0.000792988
8018975	26	NM_005567	LGALS3BP	887.26	1082.65	855.645	1004.95	1052.25	1014.84	1722.6	1249.8	1855.94	1728.1	1584.17	1546.27	1596.56	1374.84	2335.99	-0.725152	3.48657e-05	0.000792988
8087685	27	NM_007024	TMEM115	203.325	202.548	172.428	164.877	185.422	245.226	255.384	279.808	322.842	289.191	261.867	296.644	259.547	272.409	284.582	-0.611492	3.45008e-05	0.000792988
8049083	20	AF452640	PTMA	245.049	214.348	234.929	242.144	204.119	254.168	315.587	296.357	448.887	417.266	413.383	370.385	334.186	351.062	394.035	-0.770714	3.37405e-05	0.000792516
7960068	34	NM_024078	NOC4L	80.8968	103.293	97.1532	102.595	96.1008	123.467	146.068	112.63	167.458	151.742	141.731	171.301	155.253	133.057	156.87	-0.676299	3.32198e-05	0.000789745
7998886	28	NM_182687	PKMYT1	144.311	134.797	139.088	141.06	131.786	215.583	184.11	170.699	220.442	201.034	239.071	249.885	202.968	265.872	237.481	-0.734028	3.15858e-05	0.000777479
7945521	28	NM_182612	PDDC1	222.139	250.114	216.692	239.215	280.204	275.87	348.992	289.405	462.974	395.809	431.462	364.308	368.167	374.751	411.095	-0.725426	3.16653e-05	0.000777479
7941583	11	NM_030981	RAB1B	847.925	870.978	917.81	902.244	687.566	1213.32	1098.98	1108.02	1437.18	1340.52	1425.73	1405.44	1252.9	1148.31	1469.06	-0.659312	3.00257e-05	0.000762703
8148799	35	BC015471	C8orf30A	367.025	448.549	480.156	463.801	390.922	565.261	444.203	517.127	594.641	632.156	690.452	694.568	744.204	729.163	599.915	-0.662726	2.95084e-05	0.000756887
8071737	29	NM_002415	MIF	863.173	861.024	730.472	1001.73	1163.3	1090.15	1841.31	1444.68	2129.02	2155.93	1857.27	1666.95	1798.65	1617.63	1982.84	-1.01787	2.88002e-05	0.000746836
8066697	44	NM_173179	SLC35C2	261.044	278.947	294.558	299.967	323.819	368.026	421.893	338.113	506.96	456.286	462.877	468.812	423.434	389.377	483.809	-0.629736	2.82021e-05	0.000745228
8007561	30	NM_138387	G6PC3	332.624	335.925	373.01	377.862	332.128	365.83	432.396	395.493	595.012	555.166	532.235	521.32	450.821	553.329	571.704	-0.609955	2.73955e-05	0.000732599
8167322	30	NM_017883	WDR13	255.421	300.49	322.763	320.999	338.013	422.285	534.165	461.34	529.351	483.36	472.57	468.404	484.389	413.208	552.06	-0.627815	2.47324e-05	0.000698049
8153426	6	BC029031	C8orf73	44.0511	68.5006	64.5744	74.3118	61.9426	126.604	116.272	182.688	123.379	163.832	172.242	172.503	210.242	169.98	194.619	-1.42844	2.29988e-05	0.000676409
7959153	34	NM_004373	COX6A1	765.077	727.78	864.689	1072.59	922.085	1184.65	1550.47	1268.27	1955.02	1676.02	1612.47	1869.81	1410	1649.61	1964.98	-0.961878	2.30208e-05	0.000676409
8097236	30	NM_139243	ADAD1	58.484	48.428	70.6671	58.3804	60.0498	81.4611	64.2797	126.919	105.37	93.3808	113.264	91.1417	116.749	105.822	76.5536	-0.816859	2.22471e-05	0.00066358
8143879	25	NM_031434	TMUB1	115.673	115.666	112.062	93.3418	115.492	148.828	155.743	176.824	186.719	169.961	182.238	167.708	145.758	177.008	192.021	-0.635406	2.20845e-05	0.00066358
8110265	48	NM_213647	FGFR4	178.069	170.636	162.462	166.123	138.688	186.253	219.533	156.18	259.512	235.675	257.509	255.986	224.984	285.408	306.479	-0.633557	2.17869e-05	0.00066358
8171111	35	NM_001636	SLC25A6	1132.11	1200.2	1213.74	1305.3	1157.69	1270.49	1623.17	1768.83	2518.72	2350.07	2260.4	2052.16	1832.82	1962.12	2050.33	-0.847634	2.12033e-05	0.000652592
8032996	25	NM_205767	P117	243.603	260.084	247.296	250.128	275.202	302.527	357.62	366.69	435.487	396.618	393.944	428.938	334.697	377.933	387.016	-0.628418	2.12195e-05	0.000652592
8154727	18	AF091236	LOC138412	513.052	628.413	684.988	672.222	623.411	675.14	787.054	885.799	1330.52	1263.39	1068.47	1141.01	1029.5	1026.9	1066.55	-0.872619	1.94305e-05	0.000624513
8003322	18	NM_000101	CYBA	552.986	576.997	564.17	686.447	814.619	835.585	1080.89	691.005	1293.92	1238.16	1056.67	1080.86	1130.01	1095.44	1321.81	-0.846614	1.83847e-05	0.000600708
8134890	34	NM_005273	GNB2	247.537	281.388	321.499	247.801	339.091	466.879	391.859	384.345	524.236	447.785	445.647	477.135	450.478	453.95	453.053	-0.698619	1.79617e-05	0.000591798
8124437	21	NM_021018	HIST1H3F	235.918	199.329	230.598	387.986	268.535	345.252	516.658	228.312	618.449	501.475	613.414	630.68	543.296	661.975	687.995	-1.16948	1.76098e-05	0.000586611
7945573	22	NM_021128	POLR2L	563.953	653.391	658.305	630.734	580.371	891.272	900.401	923.603	1122.93	993.786	1042.95	1031.71	879.918	892.957	1035.85	-0.687217	1.71175e-05	0.000586611
8073612	28	NM_000714	TSPO	204.924	220.106	189.893	250.834	231.531	261.606	314.599	344.146	373.282	367.485	353.856	315.03	335.621	313.913	344.291	-0.645098	1.7436e-05	0.000586611
8024228	30	NM_177401	MIDN	347.764	310.217	312.014	324.043	377.487	468.278	500.833	426.494	568.687	595.144	623.269	526.236	515.021	485.341	651.568	-0.724243	1.64445e-05	0.000572975
7912102	35	NM_014851	KLHL21	70.0938	94.9722	67.2107	87.5389	83.8099	150.965	102.163	112.639	128.132	121.726	120.241	132.4	119.243	128.107	142.404	-0.630549	1.62549e-05	0.000570577
8117330	24	NM_003529	HIST1H3A	113.502	110.164	123.992	174.024	92.5858	171.764	211.606	73.6208	387.898	289.223	292.868	328.365	267.52	345.755	338.51	-1.37483	1.59978e-05	0.000567454
8153727	36	NM_013291	CPSF1	235.385	262.223	247.777	249.398	264.044	300.519	413.032	260.254	453.331	373.464	416.004	402.403	353.813	372.458	434.239	-0.650669	1.45833e-05	0.000550611
8024089	24	NM_024100	WDR18	302.502	320.88	297.105	365.862	311.749	371.129	488.947	418.996	645.299	543.042	503.146	531.319	536.452	499.19	507.307	-0.764794	1.42222e-05	0.000546307
7948772	26	NM_030628	INTS5	196.343	203.008	187.924	168.791	210.466	282.371	214.167	299.194	294.812	332.393	328.508	290.015	266.407	306.722	252.676	-0.649109	1.40318e-05	0.000545556
7998136	40	NM_022450	RHBDF1	217.533	274.804	227.38	233.04	283.902	402.655	320.451	358.027	389.932	394.766	387.592	358.087	414.438	353.549	397.313	-0.631125	1.36626e-05	0.000544596
8039166	28	NM_024298	LENG4	1213.55	1277.1	1237.59	1285.94	1204.57	1486.62	1701.5	1378.1	2166.84	2024.42	1933.32	1835.7	1761.14	1717.43	2127.65	-0.616209	1.37627e-05	0.000544596
8032670	29	NM_004886	APBA3	57.9295	63.6726	71.5756	60.8685	67.0284	71.9773	75.4903	79.4118	104.248	107.159	100.847	94.3847	100.686	85.9322	102.264	-0.622715	1.32317e-05	0.000538219
8153652	35	NM_030974	SHARPIN	376.068	346.054	317.548	305.147	295.763	401.145	439.421	494.761	577.485	531.081	556.116	490.466	530.5	465.184	627.917	-0.678494	1.23067e-05	0.000518286
8158214	36	NM_016035	COQ4	201.692	206.04	207.226	210.042	221.103	183.654	246.764	213.68	362.293	304.169	343.525	320.896	285.881	309.248	346.548	-0.617555	1.15752e-05	0.000500819
7911383	30	BC008788	C1orf159	89.6289	91.2715	98.1818	94.3097	110.678	136.171	116.107	89.3409	154.186	143.259	169.058	140.243	140.951	149.624	151.602	-0.627375	1.04136e-05	0.000479544
8159654	34	NM_015456	RP13-122B23.3	222.302	243.948	228.622	216.534	250.979	287.402	351.884	305.035	405.178	351.79	363.965	349.853	329.272	329.909	393.168	-0.61071	1.03915e-05	0.000479544
8032608	33	NM_174983	C19orf28	185.546	202.733	169.971	199.001	179.306	239.835	322.808	270.359	402.936	374.822	374.433	370.281	336.794	285.968	372.59	-0.932662	9.88822e-06	0.000471909
8030362	25	NR_000020	SNORD33	2036.74	1758.78	1360.44	1941.3	2158.9	2343.34	3463.78	3636.75	4574.65	4535.35	4670.1	4077.01	3820.64	3429.47	4795.65	-1.17658	7.76032e-06	0.000417412
7977507	25	NR_002312	RPPH1	1325.97	1431.12	1311.12	1644.02	1846.35	1634.66	2641.62	2063.58	2680.41	2814.43	3257.63	2564.96	3173.77	2998.94	3322.04	-0.947318	8.13847e-06	0.000417412
8158123	41	NM_004957	FPGS	245.258	210.135	195.672	234.648	238.251	258.316	296.472	254.657	421.218	338.636	348.948	377.419	383.929	352.854	389.59	-0.720879	8.10195e-06	0.000417412
8172447	30	NM_013271	PCSK1N	413.813	419.139	453.093	442.075	380.912	540.979	505.077	632.289	677.606	726.757	727.633	587.275	654.167	633.405	568.1	-0.662852	8.16323e-06	0.000417412
7941743	25	NM_024036	LRFN4	184.071	194.922	203.33	219.891	191.973	306.749	229.433	322.936	281.668	310.037	284.073	309.647	330.716	341.559	316.69	-0.638894	7.84954e-06	0.000417412
8148917	27	NM_138431	MFSD3	160.665	170.444	162.355	164.769	159.81	224.691	229.21	174.808	268.482	258.381	267.1	268.513	215.734	238.878	250.754	-0.62802	7.91432e-06	0.000417412
8004506	25	NR_002918	SNORA48	468.016	478.578	365.916	536.229	713.513	619.543	1006.19	822.239	1186.82	1188.96	1341.86	1083.01	1281.27	1031.7	1358.9	-1.21014	7.57936e-06	0.000411612
7992092	31	NM_022092	CHTF18	185.316	210.258	198.444	177.309	190.58	243.225	238.371	213.854	274.766	258.498	305.541	316.095	299.592	298.841	261.289	-0.603094	7.47534e-06	0.000410912
8026763	34	NM_198580	SLC27A1	65.3193	92.2842	69.057	75.4752	80.2407	78.148	106.211	87.1174	119.447	124.377	120.381	123.291	120.622	111.459	126.706	-0.649124	7.16964e-06	0.000400407
8001147	28	NM_198490	RAB43	285.082	283.953	291.248	296.608	324.194	394.617	438.067	350.448	511.47	449.825	452.353	495.585	416.206	433.746	510.434	-0.634551	7.13128e-06	0.000400407
8010243	17	NM_004710	SYNGR2	442.165	398.179	547.567	499.826	553.675	544.379	729.433	568.402	914.63	950.212	898.879	803.481	829.142	784.792	961.662	-0.822518	6.917e-06	0.000397577
8002057	32	NM_022914	ACD	219.98	216.241	190.937	208.193	218.931	272.368	300.441	230.499	427.419	382.503	347.982	354.917	341.893	332.353	391.18	-0.789702	6.82191e-06	0.000397577
8160857	28	NM_005866	OPRS1	215.984	260.119	246.291	216.436	228.282	378.973	289.499	394.643	397.3	338.765	375.758	382.676	332.716	352.954	323.259	-0.638462	6.73243e-06	0.000397577
7949645	28	NM_207340	ZDHHC24	162.456	180.175	191.306	192.46	183.861	237.838	200.412	281.38	287.486	325.455	335.318	271.666	315.711	278.785	282.334	-0.732124	6.46637e-06	0.000388699
8039937	17	BC072454	MGC10334	62.6737	65.7154	65.6894	62.6002	47.9936	139.286	120.909	83.4541	156.826	121.36	137.839	142.058	112.005	130.122	153.804	-1.13009	6.28717e-06	0.000380834
7963713	26	NM_005176	ATP5G2	706.266	747.645	696.713	686.268	728.737	667.776	959.992	1136.81	1197.72	1092.43	1127.29	1061.9	944.737	1072.8	1091.06	-0.602557	5.58527e-06	0.000363482
8148642	30	NM_024736	GSDMDC1	165.331	180.967	161.626	187.524	186.187	240.115	285.171	198.311	344.046	264.906	302.445	286.877	289.75	304.001	295.218	-0.760303	5.31276e-06	0.000354537
7945781	28	NM_003311	PHLDA2	288.92	295.113	289.603	270.996	263.266	351.673	350.042	388.686	430.137	459.89	449.056	401.298	457.552	514.753	523.645	-0.683143	5.27044e-06	0.000354537
8059244	22	NM_024536	CHPF	253.408	272.029	217.498	238.16	252.951	364.705	302.776	304.546	443.244	453.209	483.13	368.041	447.782	414.442	459.17	-0.817535	5.0359e-06	0.000341856
8031992	47	ENST00000382718	FLJ45445	850.326	895.945	835.256	980.984	1039.67	972.861	1502.63	1052.23	1638.49	1763.25	1818.86	1490.89	1675.74	1457.11	1961.93	-0.833941	4.53084e-06	0.000327323
8153664	32	uc003zbm.1	BOP1	162.038	183.523	198.477	151.28	197.257	293.352	250.423	198.99	273.602	291.663	299.816	279.822	261.505	279.465	262.302	-0.654417	4.30589e-06	0.000322041
8161024	25	NR_003051	RMRP	1256.79	1357	1332.73	1768.29	1912.12	1990.03	3185.87	2579.79	5016.68	4740.45	5095.71	3840.12	3980.95	3855.67	4414.91	-1.53539	3.9542e-06	0.000303263
8030525	31	NM_017432	PTOV1	270.64	295.717	312.918	284.095	348.187	389.793	395.76	343.346	539.121	507.004	557.444	462.016	472.258	498.497	535.766	-0.743263	4.00525e-06	0.000303263
8099037	37	NM_001120	TETRAN	393.479	396.675	324.599	362.421	441.625	437.16	646.172	573.884	810.428	855.827	787.926	722.433	744.803	645.453	903.386	-0.987968	3.52243e-06	0.000288336
8024446	27	NM_001077238	SPPL2B	211.015	248.787	268.729	243.349	249.606	284.594	375.257	271.465	514.723	477.777	505.681	456.072	399.15	437.57	492.531	-0.929096	2.72073e-06	0.000288336
8133027	84	AK125790	LOC401357	365.211	362.63	361.004	424.222	418.481	431.966	645.157	481.468	707.255	741.548	819.541	649.549	762.189	645.863	849.553	-0.900222	3.26085e-06	0.000288336
7982185	24	NM_014015	DEXI	250.317	254.142	261.095	259.334	245.761	372.088	366.369	456.349	534.97	480.126	442.631	482.342	413.015	421.164	421.918	-0.863497	3.61218e-06	0.000288336
7975562	37	NM_173462	PAPLN	814.589	991.887	773.233	796.986	877.24	644.98	1453.95	777.541	1653.1	1516.06	1727.81	1383.61	1551.86	1434.27	1847.29	-0.860227	3.21629e-06	0.000288336
8032137	44	NM_001033026	C19orf6	619.164	665.264	602.031	706.568	755.713	840.715	976.634	939.355	1266.21	1197.19	1246.32	1096.64	1117.82	1033.29	1381.33	-0.791909	3.32676e-06	0.000288336
8049689	39	NM_018226	RNPEPL1	177.992	174.62	182.084	184.043	179.26	240.062	279.06	256.205	328.768	299.032	355.05	297.892	302.322	275.476	324.412	-0.786351	2.89622e-06	0.000288336
7973352	37	NM_014045	LRP10	250.859	221.938	228.359	246.058	197.525	431.312	386.159	286.094	394.111	353.74	369.488	401.331	344.581	347.187	443.735	-0.68628	3.62502e-06	0.000288336
7992775	28	NM_152341	PAQR4	528.786	470.697	430.298	439.44	474.744	624.228	589.425	737.808	752.989	760.493	674.08	761.881	727.031	833.778	665.689	-0.681222	3.49402e-06	0.000288336
7998267	33	NM_001005920	LOC339123	373.631	389.972	394.945	423.533	352.875	464.451	585.624	487.186	665.651	580.875	673.825	625.009	558.918	607.99	686.162	-0.676966	3.54739e-06	0.000288336
7937363	35	NM_007183	PKP3	144.746	175.333	140.824	166.722	176.512	299.896	239.562	206.191	264.256	261.342	236.338	277.841	250.311	249.644	289.057	-0.674132	3.1269e-06	0.000288336
8019392	48	NM_004104	FASN	307.269	379.481	312.788	327.929	344.849	387.014	508.179	252.918	545.824	470.172	574.47	540.595	519.827	548.23	674.872	-0.672793	3.5596e-06	0.000288336
8083214	41	NM_004267	CHST2	732.488	759.368	737.278	739.238	688.391	857.449	774.804	774.408	1263.25	1155.87	1012.28	1213.17	1181.34	1090.33	1298.94	-0.656387	3.39992e-06	0.000288336
8110382	31	NM_030567	PRR7	165.549	161.53	147.022	148.615	168.634	195.386	195.485	223.93	247.897	243.832	236.579	217.143	261.535	260.262	251.017	-0.62769	3.00944e-06	0.000288336
8030429	26	NM_138639	BCL2L12	147.763	136.684	147.311	146.348	148.933	213.659	221.007	159.572	226.771	220.26	199.457	249.922	224.87	223.617	234.986	-0.624356	2.49034e-06	0.000288336
8037166	27	NM_006494	ERF	162.446	173.702	142.956	168.628	162.103	182.838	215.548	151.608	258.264	253.647	260.902	276.222	250.46	226.279	267.273	-0.650807	2.3082e-06	0.00027963
8010354	27	NM_000152	GAA	150.416	174.948	163.931	198.741	199.933	190.785	285.306	223.018	381.424	378.297	383.799	304.156	342.981	341.614	385.802	-1.00078	2.13526e-06	0.000266613
7991846	36	NM_020664	DECR2	158.279	165.359	136.51	168.198	136.631	138.274	189.521	188.964	224.306	239.727	229.845	231.76	229.922	248.849	260.006	-0.613438	1.63185e-06	0.000221552
8077082	38	ENST00000216080	TMEM112B	213.383	198.355	188.877	216.5	225.76	317.803	348.254	239.585	441.747	363.133	392.356	417.311	347.868	404.961	438.637	-0.919689	1.49855e-06	0.000210721
7998902	32	NM_017885	HCFC1R1	220.237	230.626	243.133	206.375	246.505	192.273	256.607	361.412	402.678	429.45	373.134	351.299	407.606	377.691	372.533	-0.76691	1.37012e-06	0.000199797
8003401	27	NM_000485	APRT	230.395	257.228	268.015	257.152	299.496	292.216	396.067	392.982	445.962	393.323	444.393	417.729	421.577	459.562	429.229	-0.713676	1.24743e-06	0.000187372
8019754	36	NM_207368	LOC348262	196	173.238	178.309	189.01	175.033	248.254	262.528	214.087	352.584	317.708	326.175	283.917	322.837	299.601	320.093	-0.798649	8.43923e-07	0.000161925
7998233	33	NM_021259	TMEM8	292.631	339.718	260.848	326.8	285.1	510.235	433.647	440.266	576.651	494.257	526.071	577.746	535.052	520.031	580.698	-0.838557	7.57483e-07	0.00014912
8170009	14	NM_001078171	FAM127A	596.386	629.763	651.071	732.198	613.768	587.844	886.813	779.258	1005.14	1054.13	1015.05	1119.53	994.496	975.567	1139.49	-0.672325	7.52696e-07	0.00014912
8148715	32	NM_003801	GPAA1	279.526	298.209	323.081	308.237	321.564	466.455	564.813	399.565	759.095	646.082	596.446	635.635	594.491	659.444	736.782	-1.08306	6.8585e-07	0.000148341
7977646	26	NM_016423	ZNF219	126.632	133.782	121.062	141.278	117.929	206.083	161.394	194.035	193.263	189.997	205.286	186.97	200.803	211.485	181.341	-0.627578	6.97009e-07	0.000148341
8153684	47	NM_012079	DGAT1	240.953	291.383	251.116	300.49	323.507	472.099	512.344	441.896	536.827	478.444	501.897	506.903	473.932	482.354	534.182	-0.819369	6.4993e-07	0.000146225
8148694	24	NM_000837	GRINA	507.178	508.36	497.21	560.82	575.602	630.836	818.715	737.373	872.232	900.071	842.754	794.768	822.411	785.857	1017.51	-0.658564	5.7505e-07	0.000146072
8148841	26	NM_024531	GPR172A	554.539	551.26	403.224	617.539	542.643	864.322	768.873	769.092	1016.49	950.602	985.666	1095.23	1024.44	1036.87	1036.96	-0.931564	5.41601e-07	0.000143098
7919659	29	NM_005850	SF3B4	195.268	238.297	232.26	231.958	218.925	400.41	312.601	307.506	382.493	385.284	352.756	393.472	430.304	393.896	387.822	-0.803115	5.19442e-07	0.000143098
7941985	45	NM_006019	TCIRG1	228.15	234.908	232.737	251.514	290.106	335.768	369.919	391.249	451.135	423.126	463.127	411.639	405.113	423.957	454.667	-0.795942	5.2198e-07	0.000143098
8007620	23	NM_002087	GRN	1437.87	1497.53	1397.54	1436.35	1525.71	1603.98	2294.85	2263.84	3124.35	2979.26	2668.99	2668.82	2541.71	2703.83	3819.12	-0.930708	4.03779e-07	0.000130715
7943160	25	NR_002569	SCARNA9	1101.17	1049.73	1172.24	1313.04	1453.39	773.178	2245.3	691.458	2145.56	2148.93	2129.61	2231.47	2147.12	2170.92	2424.8	-0.828134	2.33748e-07	9.68764e-05
8066031	33	NM_016558	SCAND1	251.927	289.778	244.295	269.704	275.2	289.373	363.94	341.776	461.063	416.655	413.047	417.848	410.293	426.076	461.788	-0.672216	2.00756e-07	9.29915e-05
8153497	47	NM_182706	SCRIB	140.42	167.854	168.347	153.98	165.982	207.9	210.519	236.609	248.967	234.584	252.967	254.425	238.565	249.482	252.631	-0.629681	1.68059e-07	8.82255e-05
7935855	26	NM_006562	LBX1	224.992	270.399	261.916	244.173	262.021	383.678	277.034	359.578	385.815	388.157	411.892	377.023	409.179	406.693	414.343	-0.649747	1.45341e-07	8.59835e-05
7945666	30	NM_001909	CTSD	1223.53	1457.82	1244.64	1280.63	1214.93	1098.1	1898.06	1786.97	2310.31	2421.25	2224.17	2167.39	2185.85	2156.04	2918.5	-0.805185	8.19861e-08	6.80272e-05
7991989	25	NM_138769	RHOT2	270.299	249.702	239.262	236.762	244.222	317.682	371.319	297.559	426.026	407.689	439.201	389.755	398.517	409.268	413.169	-0.731116	4.40625e-08	6.80272e-05
7992388	27	NM_012225	NUBP2	161.64	181.267	173.183	152.513	173.669	223.774	238.671	211.956	300.018	270.53	288.06	271.743	269.209	276.755	270.865	-0.729901	8.63891e-08	6.80272e-05
7994518	32	NM_032038	SPNS1	312.974	308.414	337.569	299.347	335.418	392.604	478.484	455.431	551.674	521.748	510.049	522.704	496.809	508.048	565.939	-0.701959	1.99603e-08	6.80272e-05
8049876	22	NM_032515	BOK	368.447	360.95	395.096	413.304	397.967	483.26	521.611	424.044	649.266	607.9	626.939	583.984	597.847	592.398	617.747	-0.655249	7.15759e-08	6.80272e-05
8019149	29	NM_001037984	MGC15523	335.803	383.507	403.791	400.55	354.373	512.951	540.649	410.894	587.795	573.732	579.529	589.647	603.804	611.147	564.741	-0.653802	6.95159e-08	6.80272e-05
8170882	25	NM_001183	ATP6AP1	869.762	994.371	943.006	839.627	914.787	1081.59	1356.34	1322.62	1440.68	1464.32	1380.75	1404.34	1374.04	1489.23	1852.79	-0.64393	6.90827e-08	6.80272e-05
